# Supplementary material for: Absence of DAB2IP promotes cancer stem cell like signatures and indicates poor survival outcome in colorectal cancer
Source: PubMed Central journal article supplement (PMC4643237; doi:10.1038/srep16578), 2015-11-13
Supplement: srep16578-s1.pdf [file srep16578-s1.pdf]

## Supplementary information

### **Absence of DAB2IP promotes cancer stem cell like signatures and indicates poor survival outcome in colorectal cancer**

Jiang Min<sup>1,3\*</sup>, Liang Liu<sup>1,2\*</sup>, Xiaolan Li<sup>1</sup>, Jianwu Jiang<sup>1</sup>, Jingtao Wang<sup>1</sup>,  
Bo Zhang<sup>1</sup>, Dengyi Cao<sup>1</sup>, Dongdong Yu<sup>1</sup>, Deding Tao<sup>1</sup>, Junbo Hu<sup>1,2</sup>,  
Jianping Gong<sup>1,2#</sup>, Daxing Xie<sup>1,2#</sup>

<sup>1</sup>Tongji Cancer Research Institute, <sup>2</sup>Department of Gastrointestinal Surgery, Tongji Hospital, Tongji Medical College in Huazhong University of Science and Technology, Wuhan 430030, P.R. of China.

<sup>3</sup>Gastrointestinal Surgery Department, The First Affiliated Hospital of ChongQing Medical University, Chongqing 400016, P.R. of China

\* The authors contributed to the paper equally.

#### **#Correspondence:**

Daxing Xie, M.D., Ph.D., 1095 Jiefang Av. Wuhan, Hubei 430030, China;

Phone: 86-027-83665275; Fax: 86-27-83662696; E-mail:

[xdx618@gmail.com](mailto:xdx618@gmail.com) or Jianping Gong, M.D., Ph.D., 1095 Jiefang Av.

Wuhan, Hubei 430030, China; Phone: 86-027-83665275; Fax: 86-27-

83662696; E-mail: [jpgong@tjh.tjmu.edu.cn](mailto:jpgong@tjh.tjmu.edu.cn)

Supplementary figures

# sFig.1

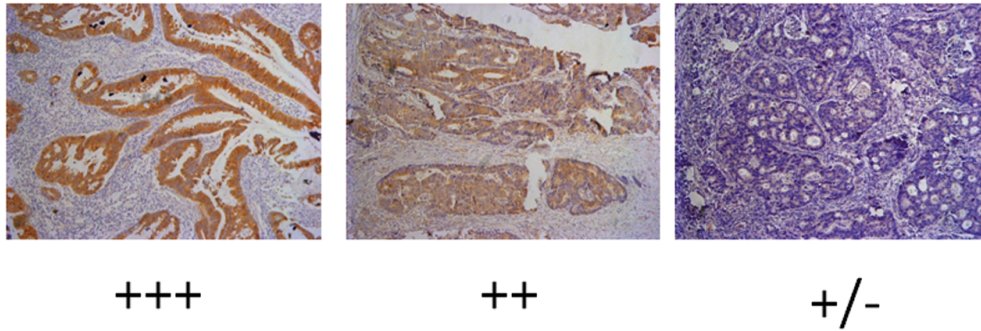

**Supplementary Figure 1: Stained grading of DAB2IP was according to intensity and extent.**

# sFig. 2

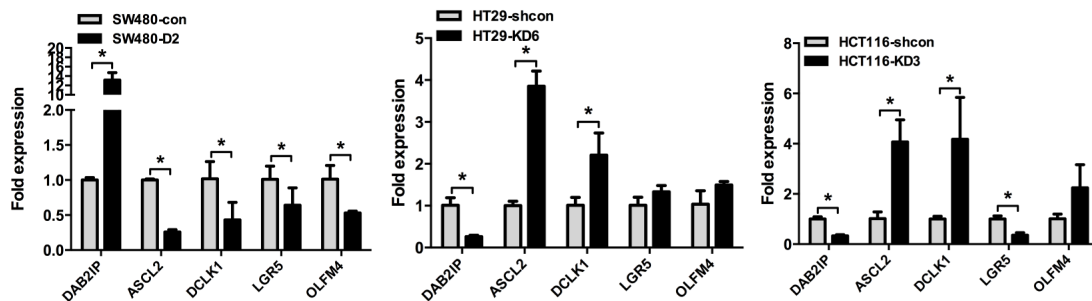

**Supplementary Figure 2: Four CSC markers are detected by quantitative RT-PCR.**

sFig. 3

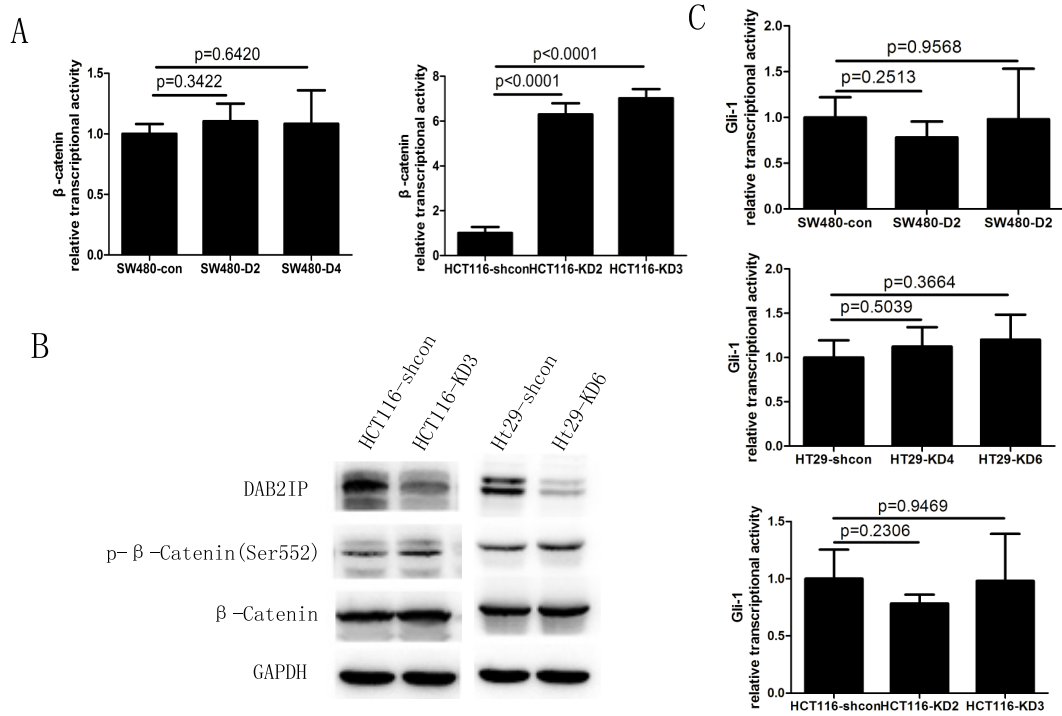

**Supplementary Figure 3: (A)  $\beta$ -catenin transcriptional activity was detected by luciferase assay in SW480 and HCT116 cells. (B) p- $\beta$ -Catenin (Ser552) and total  $\beta$ -Catenin were detected by western blot in HCT116 (shcon and KD3) and HT29 (shcon and KD-6). (C) Gli-1 transcriptional activity was detected by luciferase assay in SW480, HT29 and HCT116.**

# sFig. 4

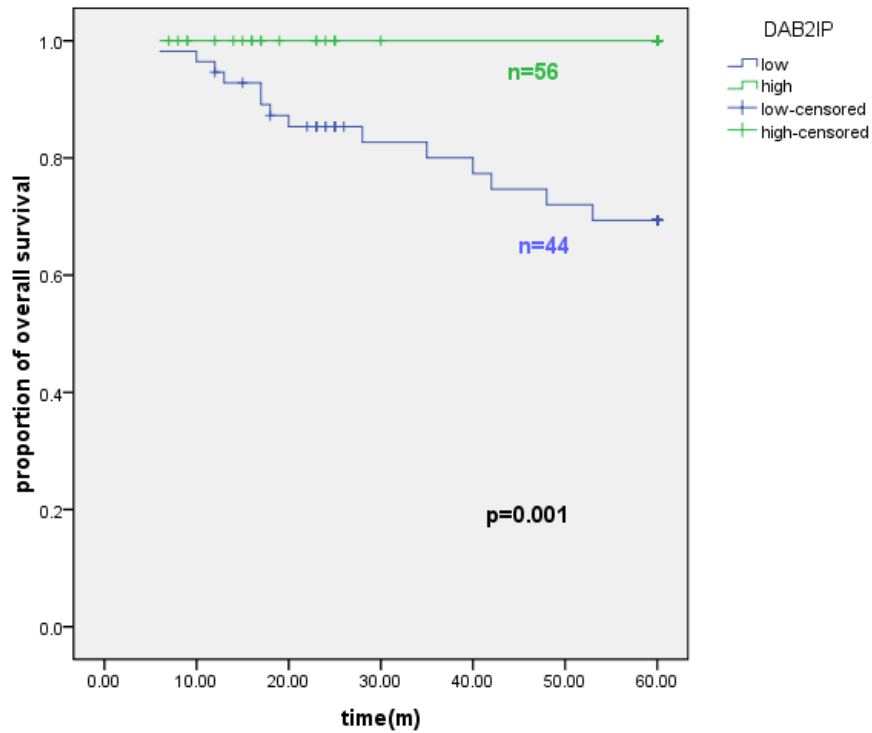

**Supplementary Figure 4:** Kaplan-Meier analysis on metastases-free colorectal patients classified by total DAB2IP expression in primary site; n = 56 for DAB2IP high group, n = 44 for DAB2IP low group. The ‘censored’ means the researchers does not get the precise survival data because of loss follow-up, accidental death and other reasons.

## Supplementary tables

### Supplementary Table 1: Primers used in this study

---

|         |         | primers                 |
|---------|---------|-------------------------|
| Twist1  | Forward | GGAGTCCGCAGTCTTACGAG    |
|         | Reverse | TCTGGAGGACCTGGTAGAGG    |
| Snail   | Forward | CCTCCCTGTCAGATGAGGAC    |
|         | Reverse | CCAGGCTGAGGTATTCCTTG    |
| Slug    | Forward | GGGGAGAAGCCTTTTTCTTG    |
|         | Reverse | TCCTCATGTTTGTGCAGGAG    |
| Foxc2   | Forward | GCCTAAGGACCTGGTGAAGC    |
|         | Reverse | TTGACGAAGCACTCGTTGAG    |
| ZEB1    | Forward | TTCAAACCCATAGTGGTTGCT   |
|         | Reverse | TGGGAGATACCAAACCAACTG   |
| CD24    | Forward | GCCAGTCTCTTCGTGGTCTC    |
|         | Reverse | CCTGTTTTTCCTTGCCACAT    |
| CD44    | Forward | AGCAACCAAGAGGCAAGAAA    |
|         | Reverse | GTGTGGTTGAAATGGTGCTG    |
| CD133   | Forward | GCCACCGCTCTAGATACTGC    |
|         | Reverse | TGTTGTGATGGGCTTGTCAT    |
| nanog   | Forward | CAACCAGACCCAGAACATCC    |
|         | Reverse | TTCCAAAGCAGCCTCCAAG     |
| Oct-4   | Forward | ACCGAGTGAGAGGCAACC      |
|         | Reverse | TGAGAAAGGAGACCCAGCAG    |
| SOX2    | Forward | CGAGTGGAAACTTTTGTCGGA   |
|         | Reverse | TGTGCAGCGCTCGCAG        |
| Bmi1    | Forward | AAATGCTGGAGAACTGGAAAG   |
|         | Reverse | CTGTGGATGAGGAGACTGC     |
| notch-1 | Forward | ATAGTCTGCCACGCCTCTG     |
|         | Reverse | AGTGTGAAGCGGCCAATG      |
| notch-2 | Forward | TCCTTCATTTACACAGGGTTCA  |
|         | Reverse | GGAGGCGACCGAGAAGAT      |
| Wnt-1   | Forward | TAAGCAGGTTTCGTGGAGGAG   |
|         | Reverse | GGTTTCTGCTACGCTGCTG     |
| Gfi-1   | Forward | CCAAGAGTCCCTGGAGCC      |
|         | Reverse | AAATCCGAAGGGAAATGAGC    |
| 18S     | Forward | GGAATTGACGGAAGGGCACCACC |
|         | Reverse | GTGCAGCCCCGGACATCTAAGG  |

---

**Supplementary Table 2: DAB2IP expression in 162 CRC patients  
and their relation to clinicopathological factors**

| feature                                     | Total number   | high           | low            | P-value      |
|---------------------------------------------|----------------|----------------|----------------|--------------|
| Age<br>≥55<br><55                           | 97<br>65       | 35<br>26       | 62<br>39       | 0.614        |
| Gender<br>Male<br>female                    | 75<br>87       | 34<br>27       | 59<br>43       | 0.793        |
| Differentiation<br>Well<br>Moderate<br>poor | 47<br>65<br>50 | 27<br>20<br>14 | 20<br>45<br>36 | <u>0.004</u> |
| Metastasis<br>Y<br>N                        | 62<br>100      | 17<br>44       | 45<br>56       | <u>0.034</u> |
| All cases                                   | 162            | 61             | 101            |              |

**Supplementary Table 3: Subcutaneous injection of tumor cells into  
nu/nu mice**

| Cell lines | Number of cells injected |       |        |
|------------|--------------------------|-------|--------|
|            | 10000                    | 50000 | 250000 |
| HT29-shcon | 0/8                      | 1/8   | 3/8    |

**Supplementary Table 4: Case description and patient features**

| Patient | Age/Sex | Site             | Dukes | metastasis | CD133(%) | DAB2IP(IHC) |
|---------|---------|------------------|-------|------------|----------|-------------|
| P1      | F       | rectum           | A     | no         | 0.58     | +++         |
| P2      | M       | rectum           | A     | no         | 1.67     | +++         |
| P3      | F       | rectum           | A     | no         | 1.67     | ++          |
| P4      | F       | transverse       | B     | no         | 2.77     | +++         |
| P5      | M       | rectum           | A     | no         | 3.11     | ++          |
| P6      | M       | rectum           | B     | no         | 3.34     | ++          |
| P7      | M       | sigmoid          | B     | no         | 4.4      | ++          |
| P8      | F       | rectum           | B     | no         | 4.41     | ++          |
| P9      | M       | rectum           | B     | no         | 5.75     | +++         |
| P10     | F       | sigmoid          | A     | no         | 6.05     | ++          |
| P11     | M       | sigmoid          | B     | no         | 6.68     | +           |
| P12     | M       | left             | A     | no         | 7        | ++          |
| P13     | F       | right            | B     | no         | 10.16    | ++          |
| P14     | M       | rectum           | B     | no         | 10.16    | +           |
| P15     | M       | Sigmoid          | C     | yes        | 6.16     | +           |
| P16     | F       | transverse       | D     | yes        | 6.28     | ++          |
| P17     | F       | rectum           | C     | yes        | 7.09     | +           |
| P18     | M       | sigmoid          | C     | yes        | 8.71     | ++          |
| P19     | M       | rectum           | D     | yes        | 8.96     | +           |
| P20     | M       | right            | C     | yes        | 9.79     | +           |
| P21     | F       | left             | C     | yes        | 11.15    | +           |
| P22     | F       | rectum           | C     | yes        | 11.87    | +           |
| P23     | M       | rectum           | C     | yes        | 12.8     | +           |
| P24     | M       | sigmoid          | C     | yes        | 13.7     | -           |
| P25     | F       | rectum           | C     | yes        | 15.6     | +           |
| P26     | M       | left-<br>sigmoid | C     | yes        | 16.0     | +           |
| P27     | M       | sigmoid          | D     | yes        | 16.63    | +           |
| P28     | M       | transverse       | C     | yes        | 18.0     | +           |
| P29     | F       | rectum           | C     | yes        | 19.23    | +           |
| P30     | F       | rectum           | D     | Yes        | 20.49    | +           |
| P31     | F       | right            | D     | yes        | 27.3     | +           |

**Supplementary Table 5: metastasis information after DAB2IP overexpression or knock down**

| <b>Cell lines</b> | <b>Number of mice with liver metastasis</b> |
|-------------------|---------------------------------------------|
| SW480-con         | 6/6                                         |
| SW480-D2          | 2/6                                         |
| HT29-shcon        | 0/6                                         |
| HT29-KD6          | 5/6                                         |
| HCT116-shcon      | 1/6                                         |
| HCT116-KD2        | 5/5                                         |
